# Supplementary material for: Hybrid correction of highly noisy long reads using a variable-order de Bruijn graph
Source: Oxford University Press journal article supplement (doi:10.1093/bioinformatics/bty521), 2018-06-27
Supplement: bioinformatics_34_24_4213_s1.pdf [file bioinformatics_34_24_4213_s1.pdf]

Hybrid correction of highly noisy long reads  
using a variable-order de Bruijn graph

**SUPPLEMENTARY MATERIAL**

Pierre Morisse<sup>1</sup>, Thierry Lecroq<sup>1</sup> and Arnaud Lefebvre<sup>1</sup>

<sup>1</sup>Normandie Univ, UNIROUEN, LITIS, 76000 Rouen, France

**Input** :  $s$  string,  $k$  integer,  $b$  boolean,  $K$  integer  
**Output** :  $E$ , the edges of the node representing the  $k$ -mer  $s$  in the de Bruijn graph of order  $k$ . If  $b = 0$ , the graph is traversed forward, otherwise, it is traversed backward.  
**Auxiliary:**  $occs$  (integer, integer) set,  $i$  integer,  $id$  integer,  $pos$  integer

```

1 begin
2    $E \leftarrow \emptyset$ 
3    $occs \leftarrow \emptyset$ 
4   if  $b = 0$  then
5     |  $occs \leftarrow getOccurrencesPositions(s[1..k - 1])$ 
6   else
7     |  $occs \leftarrow getOccurrencesPositions(s[0..k - 2])$ 
8      $i \leftarrow 0$ 
9     while  $i < size(occs)$  and  $size(E) < 4$  do
10      |  $(id, pos) \leftarrow occs[i]$ 
11      | if  $b = 0$  and  $pos + k \leq K$  then
12        |  $E \leftarrow E \cup \{(s, getKmer(id)[pos..pos + k - 1])\}$ 
13      | else if  $b = 1$  and  $pos > 0$  then
14        |  $E \leftarrow E \cup \{(s, getKmer(id)[pos - 1..pos + k - 2])\}$ 
15      |  $i \leftarrow i + 1$ 
    return :  $E$ 

```

**Algorithm S1:** Retrieve the edges of a given node. `getOccurrencesPositions` and `getKmer` are PgSA functions that allow respectively to retrieve the occurrences positions of the given string in the set of  $K$ -mers, and to retrieve the sequence corresponding to the  $K$ -mer of identifier  $id$ . Line 2: Start with an empty set of edges. Lines 3-7: If traversing the graph forward, get the occurrences positions of the suffix of  $s$  in the set of  $K$ -mers, if traversing it backward, get the occurrences positions of its prefix. Lines 8-15: Process the list of occurrences positions. The processing stops when all the occurrences have been processed or when 4 edges have been found, as we work with the DNA alphabet and cannot find more than 4 edges per node. Lines 11-12: If traversing forward and if the position component does not represent the suffix of length  $k - 1$  of the  $K$ -mer of identifier  $id$ , add an edge to the  $k$ -mer starting at position  $pos$  in this  $K$ -mer. Lines 13-14: If traversing backward and if the position component does not represent the prefix of length  $k - 1$  of the  $K$ -mer of identifier  $id$ , add an edge to the  $k$ -mer starting at position  $pos - 1$  in this  $K$ -mer.

**Input** :  $S$  (string, integer, integer, integer, string) array,  
*minOverlap* integer

**Output** : The set of seeds, after merging overlapping seeds

**Auxiliary**:  $i$  integer,  $j$  integer,  $s1$  string,  $s2$  string, *suffLen* integer,  
*suffSeq* string, *suffScore* integer

```

1 begin
2   sortByPosition( $S$ )
3    $i \leftarrow 0$ 
4    $j \leftarrow 1$ 
5   while  $i < size(S) - 1$  and  $j < size(S)$  do
6     if  $S[j].pos \leq S[i].pos + S[i].len$  then
7        $s1 \leftarrow S[i].seq[S[j].pos - S[i].pos..S[i].len - 1]$ 
8        $s2 \leftarrow S[j].seq[0..len(s1) - 1]$ 
9       if  $S[j].pos + S[j].len > S[i].pos + S[i].len$  and
10        length( $s1$ )  $\geq minOverlap$  and  $s1 = s2$  then
11          $suffLen \leftarrow S[j].pos + S[j].len - S[i].pos - S[i].len$ 
12          $suffSeq \leftarrow S[j].seq[S[j].len - suffLen..S[j].len - 1]$ 
13          $suffScore \leftarrow (S[j].score / S[j].len) \times suffLen$ 
14          $S[i].seq \leftarrow S[i].seq + suffSeq$ 
15          $S[i].len \leftarrow S[i].len + suffLen$ 
16          $S[i].score \leftarrow S[i].score + suffScore$ 
17         delete( $S[j]$ )
18       else if  $S[i].score < S[j].score$  then
19         delete( $S[j]$ )
20       else
21         delete( $S[i]$ )
22     else
23        $i \leftarrow j$ 
24        $j \leftarrow j + 1$ 

```

**Algorithm S2:** Merge seeds with overlapping alignment positions.

**Input** :  $S$  (string, integer, integer, integer, string) array,  
*maxDistance* integer, *minOverlap* integer

**Output** : The set of seeds, after merging overlapping seeds

**Auxiliary**:  $i$  integer,  $j$  integer, *overlap* integer, *suffLen* integer

```

1 begin
2   sortByPosition( $S$ )
3    $i \leftarrow 0$ 
4    $j \leftarrow 1$ 
5   while  $i < size(S) - 1$  and  $j < size(S)$  do
6     if  $S[j].pos - S[i].pos - S[i].len \leq maxDistance$  then
7       overlap  $\leftarrow overlapLength(S[i].seq, S[j].seq)$ 
8       if overlap  $\geq minOverlap$  then
9         suffLen  $\leftarrow S[j].len - overlap$ 
10        suffSeq  $\leftarrow S[j].seq[overlap..S[j].len - 1]$ 
11        suffScore  $\leftarrow (S[j].score/S[j].len) \times suffLen$ 
12         $S[i].seq \leftarrow S[i].seq + suffSeq$ 
13         $S[i].len \leftarrow S[i].len + suffLen$ 
14         $S[i].score \leftarrow S[i].score + suffScore$ 
15        delete( $S[j]$ )
16      else
17         $i \leftarrow j$ 
18         $j \leftarrow j + 1$ 
19    else
20       $i \leftarrow j$ 
21       $j \leftarrow j + 1$ 

```

**Algorithm S3:** Merge consecutive seeds with close alignment positions that overlap.

## Description of Algorithm S2

Line 2: Sort the seeds in ascending order of their alignment start position. Lines 3-4: Begin with the two first seeds. Line 5-23: Keep processing while some seeds remain. Line 6-20: The seeds have overlapping alignment positions, attempt to merge them. Lines 7-8: Retrieve the overlapping sequences from the seeds that should coincide. Line 9-16: If the  $j^{th}$  seed can extend the  $i^{th}$  seed, if the seeds overlap over a sufficient length and if their overlapping sequences do coincide, merge the seeds. Line 10-12: Get the length, sequence and score of the non-overlapping suffix of the  $j^{th}$  seed. We define the suffix score as the average score of a base times the length of suffix. Lines 13-15: Actually merge the seeds. Append the non-overlapping sequence of the  $j^{th}$  seed to the sequence of the  $i^{th}$  seed, and update the alignment length and score of the  $i^{th}$  seed accordingly. Line 16: The  $i^{th}$  and  $j^{th}$  seeds have been merged, remove the  $j^{th}$  seed from the array. Lines 17-20: The seeds cannot be merged, only keep the one with the best alignment score. Lines 21-23: The seeds do not have overlapping alignment positions, move on to the next ones.

## Description of Algorithm S3

Line 2: Sort the seeds in ascending order of their alignment start position. Lines 3-4: Begin with the two first seeds. Line 5-21: Keep processing while some seeds remain. Line 6-18: The seeds have close alignment positions, attempt to merge them. Line 7: Compute then length of the prefix-suffix overlap between the seeds. Lines 8-15: The overlap between the seeds is long enough, merge them. Line 9-11: Get the length, sequence and score of the non-overlapping suffix of the  $j^{th}$  seed. Again, we define the suffix score as the average score of a base times the length of suffix. Lines 12-14: Actually merge the seeds. Append the non-overlapping sequence of the  $j^{th}$  seed to the sequence of the  $i^{th}$  seed, and update the alignment length and score of the  $i^{th}$  seed accordingly. Line 15: The  $i^{th}$  and  $j^{th}$  seeds have been merged, remove the  $j^{th}$  seed from the array. Lines 16-18: The overlap between the seeds is too short, and the seeds cannot be merged. Move on to the next seeds. Lines 19-21: The seeds do not have close alignment positions, move on to the next ones.

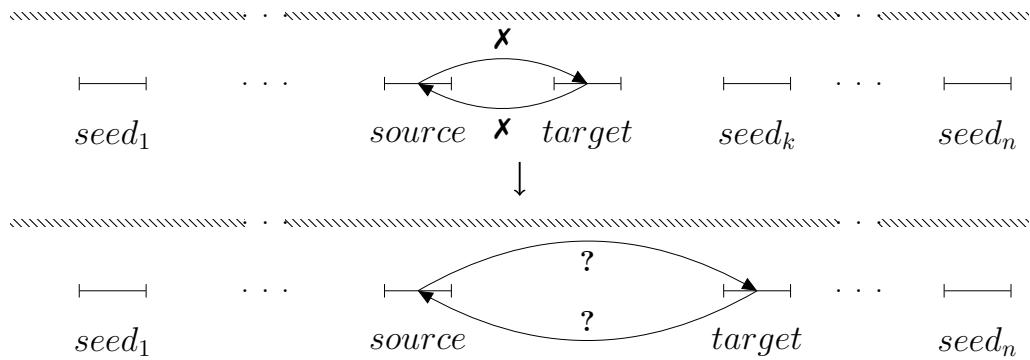

Figure S1: Illustration of the process of skipping a seed. Hatched lines represent the long read and segments represent the seeds. Top: No path allowing to link  $source$  and  $target$  together has been found.  $target$  is thus considered as erroneous and is ignored. Bottom:  $target$  is redefined as  $seed_k$ , whereas  $source$  remains unchanged. A new linking iteration is then performed between these two seeds.

| Dataset                                   | <i>A. baylyi</i>       | <i>E. coli</i>           | <i>S. cerevisiae</i>      | <i>C. elegans</i>       |
|-------------------------------------------|------------------------|--------------------------|---------------------------|-------------------------|
| <b>Reference organism</b>                 |                        |                          |                           |                         |
| Strain                                    | ADP1                   | K-12 substr. MG1655      | W303                      | Bristol N2              |
| Reference sequence                        | CR543861               | NC_000913                | scf718000000{084-13}      | GCA_000002985.3         |
| Genome size                               | 3.6 Mbp                | 4.6 Mbp                  | 12.2 Mbp                  | 100 Mbp                 |
| <b>Simulated Pacific Biosciences data</b> |                        |                          |                           |                         |
| Number of reads                           | 8,765                  | 11,306                   | 30,132                    | –                       |
| Average length                            | 8,202                  | 8,226                    | 8,204                     | –                       |
| Number of bases                           | 72 Mbp                 | 93 Mbp                   | 247 Mbp                   | –                       |
| Coverage                                  | 20x                    | 20x                      | 20x                       | –                       |
| <b>Real Oxford Nanopore data</b>          |                        |                          |                           |                         |
| Accession number                          | ERR77685{1-5}          | Genoscope <sup>2</sup>   | Genoscope <sup>3</sup>    | ERR1802061 <sup>4</sup> |
|                                           | Genoscope <sup>1</sup> | Sequences from Loman Lab | Sequences from Schatz Lab |                         |
| Number of reads                           | 89,011                 | 22,270                   | 205,923                   | 363,500                 |
| Average length                            | 4,284                  | 5,999                    | 5,698                     | 5,524                   |
| Number of bases                           | 381 Mbp                | 134 Mbp                  | 1,173 Mbp                 | 2,008 Mbp               |
| Coverage                                  | 106x                   | 29x                      | 95x                       | 20x                     |
| <b>Illumina data</b>                      |                        |                          |                           |                         |
| Accession number                          | ERR788913 <sup>4</sup> | Genoscope <sup>5</sup>   | Genoscope <sup>6</sup>    | ART                     |
|                                           |                        | Sequences from Loman Lab | Sequences from Schatz Lab |                         |
| Number of reads                           | 900,000                | 775,500                  | 2,500,000                 | 20,057,100              |
| Read length                               | 250                    | 300                      | 250                       | 250                     |
| Number of bases                           | 224 Mbp                | 232 Mbp                  | 625 Mbp                   | 5,000 Mbp               |
| Coverage                                  | 50x                    | 50x                      | 50x                       | 50x                     |

Table S1: Description of the data used in the experiments.

<sup>1</sup><http://www.genoscope.cns.fr/externe/nas/datasets/MinION/acineto/>, reads from run6.

<sup>2</sup><http://www.genoscope.cns.fr/externe/nas/datasets/MinION/ecoli/>

<sup>3</sup><http://www.genoscope.cns.fr/externe/nas/datasets/MinION/yeast/>

<sup>4</sup>Only a subset of the data was used.

<sup>5</sup><http://www.genoscope.cns.fr/externe/nas/datasets/Illumina/ecoli/>

<sup>6</sup><http://www.genoscope.cns.fr/externe/nas/datasets/Illumina/yeast/>

| Method               | Original | CoLoRMap | HALC    | HG-CoLoR      | Jabba         | LoRDEC  | Nanocorr | NaS       | Canu     | Daccord       | LoRMA   |
|----------------------|----------|----------|---------|---------------|---------------|---------|----------|-----------|----------|---------------|---------|
| <i>S. cerevisiae</i> |          |          |         |               |               |         |          |           |          |               |         |
| Error rate (%)       | 66.6190  | 8.2290   | 8.3101  | <b>8.1013</b> | 8.3748        | 10.5821 | 8.3165   | 8.9441    | 15.3633  | 8.1599        | 41.1934 |
| Throughput (Mbp)     | 247.2    | 22.2     | 23.1    | 23.4          | 20.1          | 23.2    | 23.6     | 17.8      | 21.9     | <b>23.8</b>   | 1.6     |
| Deletions (%)        | 3.8998   | 0.8258   | 0.8479  | 0.8130        | <b>0.8094</b> | 1.0236  | 0.8595   | 0.8403    | 2.1142   | 0.8551        | 3.4136  |
| Insertions (%)       | 13.990   | 4.7652   | 4.811   | <b>4.7537</b> | 4.8851        | 6.1702  | 4.9694   | 5.5993    | 10.3363  | 4.9015        | 23.6213 |
| Substitutions (%)    | 57.9724  | 3.7327   | 3.7514  | 3.6307        | 3.7767        | 4.6795  | 3.5894   | 3.7016    | 4.1568   | <b>3.5049</b> | 16.3801 |
| Split reads (%)      | N/A      | 13.31    | 18.20   | 3.67          | 13.66         | 68.53   | <b>0</b> | <b>0</b>  | <b>0</b> | 1.30          | 60.59   |
| Runtime              | N/A      | 4h42min  | 1h19min | 4h32min       | <b>5min</b>   | 28min   | 39h52min | 217h20min | 30min    | 1h15min       | 20min   |

∞

Table S2: Statistics of the long reads after correction with the different methods, as reported by LRCStats, on the *S. cerevisiae* dataset. The best result for each statistic is highlighted. These results are however erroneous, as LRCStats reported an error rate of 66%, whereas parsing the files generated by SimLord reported an error rate of 18.6%, comparable to that of the other simulated datasets.



| Method                | Original | Nanocorr  | CoLoRMap | LoRDEC  | HALC     | LoRMA   |
|-----------------------|----------|-----------|----------|---------|----------|---------|
| <i>A. baylyi</i>      |          |           |          |         |          |         |
| Number of reads       | 89,011   | 24,105    | 17,380   | 22,288  | 35,099   | 17,984  |
| Split reads (%)       | N/A      | 0         | 43.63    | 45.08   | 13.70    | 89.38   |
| Average length        | 4,284    | 7,205     | 3,883    | 3,449   | 4,498    | 229     |
| Number of bases (Mbp) | 381      | 174       | 141      | 175     | 190      | 76      |
| Average identity (%)  | 70.09    | 91.95     | 99.32    | 99.80   | 96.62    | 99.58   |
| Genome coverage (%)   | 100      | 100       | 100      | 100     | 100      | 66.52   |
| Runtime               | N/A      | 22h28min  | 3h41min  | 16min   | 47h41min | 29min   |
| <i>E. coli</i>        |          |           |          |         |          |         |
| Number of reads       | 22,270   | 21,764    | 20,161   | 21,983  | 22,215   | 14,569  |
| Split reads (%)       | N/A      | 0         | 19.28    | 26.60   | 7.97     | 84.78   |
| Average length        | 5,999    | 5,899     | 4,475    | 4,135   | 8,409    | 165     |
| Number of bases (Mbp) | 134      | 128       | 115      | 125     | 131      | 18      |
| Average identity (%)  | 79.46    | 95.80     | 99.30    | 99.83   | 99.36    | 99.61   |
| Genome coverage (%)   | 100      | 100       | 100      | 100     | 100      | 25.07   |
| Runtime               | N/A      | 5h48min   | 2h01min  | 13min   | 2h14min  | 12min   |
| <i>S. cerevisiae</i>  |          |           |          |         |          |         |
| Number of reads       | 205,923  | 66,953    | 39,088   | 59,075  | 89,860   | 14,856  |
| Split reads (%)       | N/A      | 0         | 45.02    | 75.03   | 28.04    | 55.34   |
| Average length        | 5,698    | 3,455     | 2,294    | 1,126   | 1,893    | 230     |
| Number of bases (Mbp) | 1,173    | 231       | 165      | 221     | 256      | 11      |
| Average identity (%)  | 55.49    | 87.10     | 99.45    | 98.45   | 98.45    | 95.93   |
| Genome coverage (%)   | 99.90    | 99.59     | 99.09    | 98.87   | 99.13    | 3.80    |
| Runtime               | N/A      | 158h53min | 10h44min | 1h09min | 2h56min  | 1h36min |
| <i>C. elegans</i>     |          |           |          |         |          |         |
| Number of reads       | 363,500  | —         | 135,544  | 50,448  | —        | 10,109  |
| Split reads (%)       | N/A      | —         | 20,68    | 62.99   | —        | 66.87   |
| Average length        | 5,524    | —         | 2,273    | 1,322   | —        | 270     |
| Number of bases (Mbp) | 2,008    | —         | 419      | 222     | —        | 10      |
| Average identity (%)  | 71.07    | —         | 98.11    | 96.63   | —        | 97.76   |
| Genome coverage (%)   | 99.99    | —         | 96.37    | 85.20   | —        | 1.71    |
| Runtime               | N/A      | —         | 91h17min | 1h01min | —        | 1h13min |

Table S3: Statistics of the long reads, before and after correction by the different methods excluded from the main comparison.

Similarly to the experiments on simulated data, LoRMA also performed the worst on real data. Its throughput was the smallest among all the tools, the corrected reads it output displayed a size closer to that of short reads, and covered all the reference genomes very poorly. Nanocorr was the slowest among all the tools, behind NaS, except on the *A. baylyi* dataset, where HALC was the slowest. In addition, Nanocorr did not manage to produce corrected long reads of good quality. Indeed, the lowest error rate it managed to reach was still of more than 4%, on the *E. coli* dataset. On average, the error rate of the output long reads was comparable to, or even worse than what self-correction methods achieved. The long reads, however, covered the reference genomes very well. On the larger *C. elegans* dataset, Nanocorr was not run due to its large runtimes. On all the datasets but *C. elegans*, on which it failed to perform correction because of an internal error of LoRDEC, HALC produced the greatest number of corrected long reads. However, its throughput was not proportional to that number, as, despite correcting more long reads, it actually output less bases than HG-CoLoR, up to two times less on the *S. cerevisiae* dataset. Moreover, its runtimes were quite unpredictable, as it took near to two days to correct the *A. baylyi* dataset, and less than 3 hours to correct the *S. cerevisiae* dataset, despite the former being three times smaller than the latter. As observed during the experiments on simulated data, despite being fast, LoRDEC did once again split an important proportion of long reads, as high as 75% on the *S. cerevisiae* dataset. As a result, even though they aligned with a high identity, except on *C. elegans* to which LoRDEC did not scale, the long reads corrected with LoRDEC displayed the shortest average length among all the other long reads but those corrected with LoRMA, reaching less than 20% of the length of the original long reads on *S. cerevisiae*. Finally, CoLoRMap did also split a lot of long reads, and thus output corrected long reads of much shorter length than the original long reads. The throughput of CoLoRMap was also smaller than that of all the other methods, except for LoRDEC on the *C. elegans* dataset. Compared to HG-CoLoR, which has a bit shorter, but comparable runtimes, CoLoRMap performed worse on every studied statistic.

| Method               | Nanocorr  | CoLoRMap  | LoRDEC    | HALC      | LoRMA |
|----------------------|-----------|-----------|-----------|-----------|-------|
| <i>A. baylyi</i>     |           |           |           |           |       |
| Long reads coverage  | 48x       | 39x       | 49x       | 53x       | 21x   |
| Number of contigs    | 1         | 2         | 1         | 1         | 7     |
| NG50                 | 3,571,959 | 3,627,107 | 3,620,390 | 3,598,721 | —     |
| Genome coverage (%)  | 98.59     | 100       | 100       | 99.92     | 0.56  |
| Identity (%)         | 99.98     | 99.99     | 99.99     | 99.98     | 97.81 |
| <i>E. coli</i>       |           |           |           |           |       |
| Long reads coverage  | 28x       | 25x       | 27x       | 28x       | 4x    |
| Number of contigs    | 13        | 1         | 1         | 2         | 1     |
| NG50                 | 824,971   | 4,642,509 | 4,649,617 | 4,650,960 | —     |
| Genome coverage (%)  | 98.61     | 100       | 100       | 99.99     | 0.59  |
| Identity (%)         | 99.98     | 99.99     | 99.98     | 99.97     | 97.96 |
| <i>S. cerevisiae</i> |           |           |           |           |       |
| Long reads coverage  | 19x       | 13x       | 18x       | 21x       | 1x    |
| Number of contigs    | 111       | 89        | 398       | 108       | 1     |
| NG50                 | 181,605   | 224,554   | 14,761    | 130,894   | —     |
| Genome coverage (%)  | 96.53     | 97.71     | 68.85     | 96.60     | 1.07  |
| Identity (%)         | 99.81     | 99.94     | 99.86     | 99.89     | 96.33 |
| <i>C. elegans</i>    |           |           |           |           |       |
| Long reads coverage  | —         | 4x        | 2x        | —         | 0x    |
| Number of contigs    | —         | 2,164     | 832       | —         | 9     |
| NG50                 | —         | 16,610    | —         | —         | —     |
| Genome coverage (%)  | —         | 63.54     | 15.71     | —         | 0.15  |
| Identity (%)         | —         | 99.42     | 99.81     | —         | 98.00 |

Table S4: Statistics of the assemblies generated from the long reads corrected with the different methods excluded from the main comparison.

In agreement with the results observed in Supplementary Table S3, the long reads corrected with LoRMA could not be assembled at all. The long reads corrected with Nanocorr, despite covering the reference genomes well, only assembled into a satisfying number of contigs for the *A. baylyi* dataset. The assembly results on the *S. cerevisiae* dataset were however comparable to those of the other methods. Moreover, for all the assemblies generated from long reads corrected with Nanocorr, a few regions of the reference genomes were not resolved, likely because of the relatively high error rate of the long reads. The long reads corrected with CoLoRMap, despite the small throughput of the tool, surprisingly assembled quite well. A single contig was obtained for *E. coli*, and two contigs, including one of the size of the actual reference genome, were obtained for *A. baylyi*. On the *S. cerevisiae* dataset, these corrected long reads assembled into a smaller number of contigs, covering the reference genome better than those corrected with NaS. The genome coverage was also slightly higher than that of the assembly obtained with long reads corrected with HG-CoLoR, but the number of contigs and NG50 size were less satisfying. However, on the *C. elegans* dataset, the obtained assembly was highly unsatisfying, because of the weak coverage of the corrected long reads, underlining the fact that the method does not scale to larger datasets. The long reads corrected with LoRDEC also assembled into a single contig for both the *A. baylyi* and the *E. coli* datasets, despite being highly split. However, on the two larger datasets, the obtained assemblies were composed of a lot of contigs, and failed to resolve large regions of the reference genomes. Indeed, close to a third of *S. cerevisiae* was not resolved, and only a bit more than 15% of *C. elegans* was covered by contigs. Finally, the long reads corrected with HALC assembled quite well for the first two datasets. A single contig was obtained for *A. baylyi*, and two contigs, including one of the size of the actual reference genome, were obtained for *E. coli*. On the *S. cerevisiae* dataset, the corrected long reads yielded an assembly comparable to Nanocorr in terms of number of contigs, and to NaS in terms of NG50 size.

| Pre-processing        | QuorUM | Karect |
|-----------------------|--------|--------|
| <i>A. baylyi</i>      |        |        |
| Number of reads       | 16,618 | 16,618 |
| Split reads (%)       | 4.90   | 4.86   |
| Average length        | 10,260 | 10,260 |
| Number of bases (Mbp) | 179    | 179    |
| Average identity (%)  | 99.40  | 99.40  |
| Genome coverage (%)   | 99.82  | 99.80  |
| <i>E. coli</i>        |        |        |
| Number of reads       | 21,005 | 21,006 |
| Split reads (%)       | 4.98   | 4.88   |
| Average length        | 5,797  | 5,794  |
| Number of bases (Mbp) | 128    | 128    |
| Average identity (%)  | 99.81  | 99.81  |
| Genome coverage (%)   | 99.43  | 99.41  |
| <i>S. cerevisiae</i>  |        |        |
| Number of reads       | 33,484 | 33,250 |
| Split reads (%)       | 11.47  | 10.55  |
| Average length        | 6,455  | 6,613  |
| Number of bases (Mbp) | 243    | 244    |
| Average identity (%)  | 99.54  | 99.55  |
| Genome coverage (%)   | 93.32  | 93.19  |

Table S5: Comparison of the long reads corrected with Jabba, when correcting the short reads with QuorUM or with Karect.

| Method           | Original   | HG-CoLoR<br>(125 bp SR) | HG-CoLoR<br>(250-300 bp SR) |
|------------------|------------|-------------------------|-----------------------------|
| <i>A. baylyi</i> |            |                         |                             |
| Error rate       | 0.178534   | 0.000186                | 0.000310                    |
| Throughput       | 71,891,604 | 64,640,676              | 64,608,112                  |
| Deletions        | 2,797,255  | 6,464                   | 7,802                       |
| Insertions       | 10,036,447 | 5,284                   | 11,511                      |
| Substitutions    | 516,638    | 2,155                   | 3,791                       |
| Split reads (%)  | N/A        | 0                       | 0.01                        |
| Runtime          | N/A        | 48min                   | 47min                       |
| <i>E. coli</i>   |            |                         |                             |
| Error rate       | 0.179267   | 0.000417                | 0.000596                    |
| Throughput       | 93,005,258 | 83,557,763              | 83,447,846                  |
| Deletions        | 3,635,647  | 25,359                  | 23,342                      |
| Insertions       | 13,038,057 | 10,436                  | 28,927                      |
| Substitutions    | 671,040    | 4,479                   | 5,223                       |
| Split reads (%)  | N/A        | 0.04                    | 0.03                        |
| Runtime          | N/A        | 59min                   | 45min                       |

Table S6: Statistics of the simulated long reads after correction by HG-CoLoR, with short reads of length 125 bp, as reported by LRCStats. The results on the *S. cerevisiae* dataset are omitted, as LRCStats reported erroneous results.

| Method                | Original | HG-CoLoR<br>(125 bp SR) | HG-CoLoR<br>(250-300 bp SR) |
|-----------------------|----------|-------------------------|-----------------------------|
| <i>A. baylyi</i>      |          |                         |                             |
| Number of reads       | 89,011   | 26,450                  | 25,278                      |
| Split reads (%)       | N/A      | 1.60                    | 1.01                        |
| Average length        | 4,284    | 11,143                  | 11,157                      |
| Number of bases (Mbp) | 381      | 299                     | 285                         |
| Average identity (%)  | 70.09    | 99.90                   | 99.75                       |
| Genome coverage (%)   | 100      | 99.99                   | 100                         |
| Runtime               | N/A      | 1h44min                 | 1h56min                     |
| <i>E. coli</i>        |          |                         |                             |
| Number of reads       | 22,270   | 22,138                  | 21,970                      |
| Split reads (%)       | N/A      | 0.29                    | 0.07                        |
| Average length        | 5,999    | 6,047                   | 6,093                       |
| Number of bases (Mbp) | 134      | 134                     | 134                         |
| Average identity (%)  | 79.46    | 99.94                   | 99.84                       |
| Genome coverage (%)   | 100      | 99.99                   | 100                         |
| Runtime               | N/A      | 1h15min                 | 1h05min                     |
| <i>S. cerevisiae</i>  |          |                         |                             |
| Number of reads       | 205,923  | 73,670                  | 72,228                      |
| Split reads (%)       | N/A      | 3.55                    | 5.13                        |
| Average length        | 5,698    | 7,484                   | 6,724                       |
| Number of bases (Mbp) | 1,173    | 572                     | 512                         |
| Average identity (%)  | 55.49    | 99.50                   | 99.10                       |
| Genome coverage (%)   | 99.90    | 99.93                   | 99.40                       |
| Runtime               | N/A      | 8h50min                 | 8h36min                     |
| <i>C. elegans</i>     |          |                         |                             |
| Number of reads       | 363,500  | 282,425                 | 278,614                     |
| Split reads (%)       | N/A      | 8.42                    | 8.85                        |
| Average length        | 5,524    | 5,324                   | 5,127                       |
| Number of bases (Mbp) | 2,008    | 1,641                   | 1,567                       |
| Average identity (%)  | 71.07    | 98.90                   | 98.93                       |
| Genome coverage (%)   | 99.99    | 99.98                   | 99.95                       |
| Runtime               | N/A      | 95h17min                | 80h34min                    |

Table S7: Statistics of the real long reads, before and after correction by HG-CoLoR, with short reads of length 125 bp and of length 250-300 bp.

| Method               | HG-CoLoR<br>(125 bp SR) | HG-CoLoR<br>(250-300 bp SR) |
|----------------------|-------------------------|-----------------------------|
| <i>A. baylyi</i>     |                         |                             |
| Long reads coverage  | 83x                     | 79x                         |
| Number of contigs    | 2                       | 1                           |
| NG50                 | 3,594,329               | 3,634,461                   |
| Genome coverage (%)  | 99.97                   | 99.99                       |
| Identity (%)         | 99.98                   | 99.94                       |
| <i>E. coli</i>       |                         |                             |
| Long reads coverage  | 29x                     | 29x                         |
| Number of contigs    | 1                       | 1                           |
| NG50                 | 4,640,101               | 4,659,731                   |
| Genome coverage (%)  | 99.99                   | 100                         |
| Identity (%)         | 99.99                   | 99.99                       |
| <i>S. cerevisiae</i> |                         |                             |
| Long reads coverage  | 46x                     | 41x                         |
| Number of contigs    | 47                      | 67                          |
| NG50                 | 452,906                 | 297,575                     |
| Genome coverage (%)  | 99.12                   | 97.57                       |
| Identity (%)         | 99.91                   | 99.92                       |
| <i>C. elegans</i>    |                         |                             |
| Long reads coverage  | 16x                     | 15x                         |
| Number of contigs    | 236                     | 352                         |
| NG50                 | 820,836                 | 458,250                     |
| Genome coverage (%)  | 98.95                   | 98.41                       |
| Identity (%)         | 99.86                   | 99.86                       |

Table S8: Statistics of the assemblies generated from the real long reads, after correction by HG-CoLoR, with short reads of length 125 bp and of length 250-300 bp. Reported identities stand for the 1-to-1 alignments.



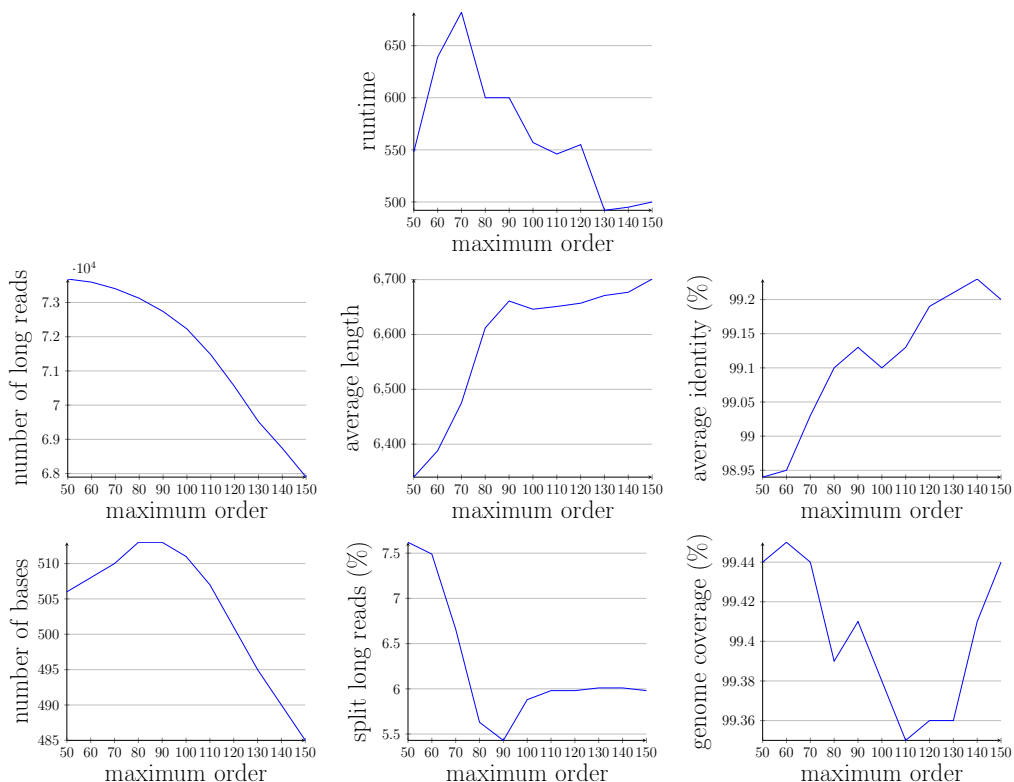

Figure S2: Impact of the maximum order of the graph on the results, when fixing other parameters. To obtain fair comparisons, the minimum order of the graph was set to half of the maximum order for each experiment. Runtimes are reported for the execution of the whole correction pipeline. We acknowledge that a maximum order of 100 yields more split, and thus slightly shorter reads, that display a lower identity than a maximum order of 90. However, it allows the pipeline to run almost an hour faster, and thus provides a satisfying compromise. Compared to these two values, higher orders tend to display a higher identity, but correct less long reads, and thus output less bases, whereas lower orders tend to correct more long reads, that are however more split, and thus shorter, in addition to display larger runtimes.

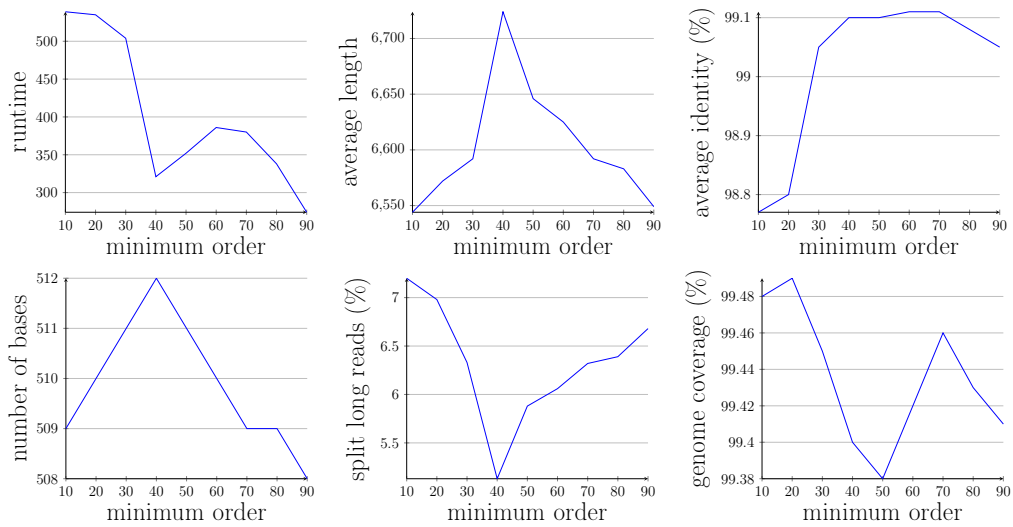

Figure S3: Impact of the minimum order of the graph on the results, when fixing other parameters. Runtimes are reported for the execution of the seeds linking and tips extension steps only. The statistics of the number of corrected long reads are not shown, as all the minimum order values corrected the same number of long reads. Apart from genome coverage and average identity of the long reads, all the other statistics displayed a clear peak with a minimum order value of 40.

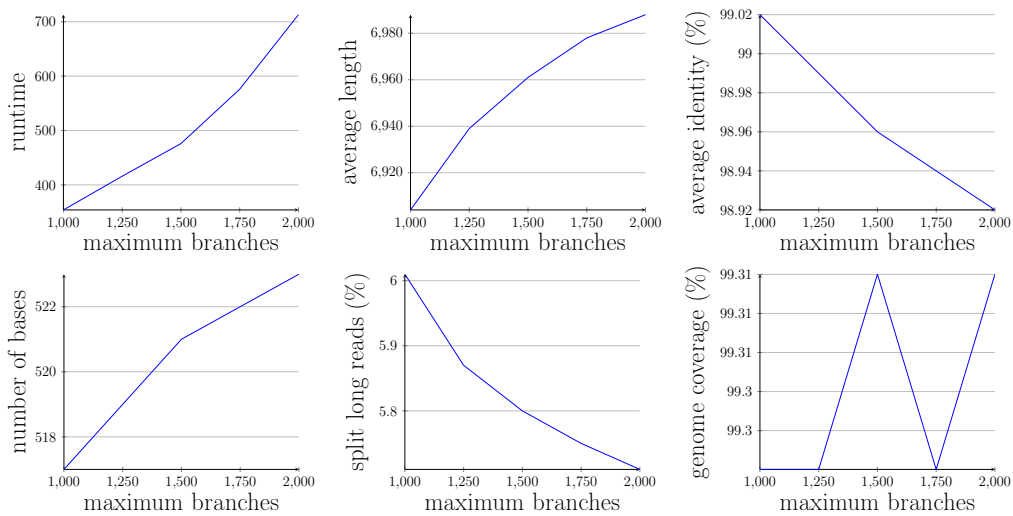

Figure S4: Impact of the maximum number of branches explorations on the results, when fixing other parameters. Runtimes are reported for the execution of the seeds linking and tips extension steps only. The statistics of the number of corrected long reads are not shown, as all the maximum number of branches explorations values corrected the same number of long reads.
